# Supplementary material
Source: Research Square preprint supplement (doi:10.21203/rs.3.rs-9935660/v1)
Supplement: Supplementary file 1 [file a9a30657388e7cbfc572185b.docx]

**Methods**

**Cell lines**

Naïve mouse ESCs- J1 (male, ATCC, SCRC-1010, RRID:CVCL_6412), OG2 (male, The Jackson Laboratory, Strain #004654) , OG2+/−GOF6+/− (male, derived from Choi et al., 2016) were cultured on 0.5% porcine gelatin-coated plates in either DMEM-based naïve mESC culture media consisting of DMEM high glucose (Gibco) with 15% FBS (Gibco), 1% Glutamax (Gibco), 1% MEM-nonessential amino acids (Gibco), 0.1% Gentamycin (Gibco), 0.1mM β-mercaptoethanol (Gibco), 1000 U/ml mouse leukemia inhibitory factor (mLIF) (Millipore, Merck), 1μM PD0325901 (Biogems) and 3μM CHIR99021-at 37 °C and 5% CO2 incubating condition. Primed mouse ESCs (PJ1, POG2) were cultured on Matrigel (Corning #354277)-coated plates in either EpiSC culture media consisting of DMEM/F12 (Gibco) with 20% KnockOut Serum Replacement (Gibco), 1% GlutaMAX (Gibco), 1% MEM-nonessential amino acids (Gibco), 0.1% Gentamycin (Gibco), 10 ng/ml murine bFgf (Peprotech), 20 ng/ml murine Activin A (Peprotech). Cell lines were routinely passaged every 3 days. Naïve mESCs were treated with Accutase (BD Biosciences) for single cell dissociation and replated at a 1:20 ratio. Primed mESCs were passaged using 1 U/ml Dispase (Gibco) as a colony detachment reagent, with detached colony clumps transferred at a 1:15–1:20 ratio onto Matrigel-coated plates. Culture media was changed daily.

**Establishment and sequence validation of Knockout cell lines**

For establishment of Mtf2 KO OG2+/-GOF6+/- cell line, we transfected pRGEN-Cas9-CMV-Puro-RFP (Toolgen-TGEN_OP1) plasmids with sgRNA of Mtf2 cloned into pRG2 (Addgene# 104174) plasmid as previously described 1, with the following sgRNA sequence (5’-AGAAGAAGAAGCATTTGTTT-3’) adopted from a previous study 2 . For establishment of *Jarid2* KO OG2+/-GOF6+/- cell line, pRGEN-Cas9-CMV-Puro-RFP (Toolgen-TGEN_OP1) plasmids were co-transfected with two sgRNAs of *Jarid2* cloned into pRG2 (Addgene# 104174) plasmid, with following sgRNA sequences (5’-CACATACAATCCTTTAAAGG-3’ and 5’- AGCAAGTGTGAATCTACCAC-3’) adopted from the same previous study 2. Two sgRNAs were used to remove exon 4 of Jarid2 leading to premature stop codon in Exon 5. The cloned gRNA vectors (3 μg) and Cas9 plasmid vectors (1 μg) were co-transfected into 1x106 mESCs using Lipofectamine 3000 reagent (#L3000-001, Invitrogen). After 24 hours, puromycin selection (2 μg/ml) was performed for 24 hours. Single-colony picking was performed to establish at least two single clones from each Knockout pool. Targeted sequence of each single clone was validated by Sanger sequencing after gDNA isolation through Wizard® Genomic DNA Purification Kit (#A1120, Promega). Knockout efficiency was initially determined by T7E1 assay as previously described 3.

**EPSC induction from pluripotent stem cells**

EPSC induction was performed as previously described 4. The OG2+/-GOF6+/- cells were seeded on 0.5% porcine gelatin-coated dish. After attachment onto plates, cells were cultured in EPSCM – DMEM/F12 high glucose no glutamine (Gibco) supplemented with 20% Knockout Serum Replacement (Gibco), 1% Pen Strep Glutamine (Gibco), 1% MEM-nonessential amino acids (Gibco), 0.1mM β-mercaptoethanol (Gibco), 1,000 U/ml mouse leukemia inhibitory factor (mLIF) (Sigma-Aldrich), 1 μM PD0325901 (Biogems), 3 μM CHIR99021 (Biogems), 4 μM JNK inhibitor VIII (Sigma-Aldrich), 10 μM SB203580 (Sigma-Aldrich), 0.3 μM A-419259 trihydrochloride (Sigma-Aldrich), 5 μM XAV939 (Sigma-Aldrich)- for more than 15 days. The cells were passaged every 2~3 days. The established EPSCs were maintained in EPSCM as cell line.

**Cell Stock Preparation**

Naïve mESCs were cryopreserved using a freezing medium composed of naïve mESC culture medium (see above), FBS (Gibco), DMSO (Sigma Life Science) at a 7:2:1 ratio. Primed mESCs were cryopreserved using mFreSR (Stemcell Technologies). EPSCs were cryopreserved using freezing medium composed of EPSCM (see above), FBS (Gibco), DMSO (Sigma Life Science) at an 8:1:1 ratio. Cells were resuspended in the freezing medium at a density of 0.5-1 x 10^6 cells/mL and transferred to cryovials. Cryovials then moved to -80 °C deep freezer using freezing container overnight before moved to liquid nitrogen for long-term storage.

**Cell sorting of OG2+/-GOF6+/- cell line based on GFP and RFP signal**

Cells were dissociated into single cells using Accutase (BD Biosciences), followed by PBS wash x2. Cells were resuspended in PBS and sorted using FACS Aria III cell sorter (BD Biosciences). J1 (mouse naïve ESCs) cells were used as double negative sample for compensation. OG2 (mouse naïve ESCs) cells were used as GFP only positive sample for compensation.

**Induction of Trophoblast Stem Cells**

Induction of trophoblast stem cells was performed as previously described 5. Cells were seeded on a 0.5% porcine gelatin-coated dish and cultured on LIF+2i media. As TSC media is developed for human cells, we adopted partial induction for up to 4 days. After two days of seeding, media was switched to TSC medium – DMEM/F12 supplemented with 0.1mM 2-mercapto ethanol (Gibco), 0.2% FBS (Sigma-Aldrich, ES-009-B), 0.5% Penicillin/Streptomycin (Gibco), 0.3% BSA (Sigma-Aldrich), 1% ITS-X (Gibco, 51500), 1.5 μg/ml L-ascorbic acid (Sigma-Aldrich), 50 ng/ml mEGF (Gibco, PMG-8041), 2 μM CHIR-99021 (Biogems), 0.8 mM Valporic acid (Tocris, 2815), 0.5 μM A83-01 (Tocris), 1 μM SB431542 (Abcam), and 5 μM Y-27632 (Gibco) – for 4 days.

**Blastoid induction**

Blastoid induction was performed as previously described 6. Cells were dissociated into single cells using Accutase (BD Biosciences). AggreWell 400 (STEMCELL Technologies) was prepared according to the manufacturer’s instructions. The blastoid formation medium consisted of 25% TSC basal medium (as previously described 6), 25% of NDiff227 (TAKARA), and 50% EmbryoMax Advanced KSOM (Sigma-Aldrich), 12.5 ng/ml mFgf4 (R&D systems), 0.5 ng/ml Heparin (STEMCELL Technologies), 3 μM CHIR99021 (Biogems), 5 ng/ml BMP4 (R&D systems) and 0.5 μM A83-01 (Tocris). The dissociated cells were resuspended into the blastoid formation medium supplemented with 2 μM Y27632 (Gibco). Total 30 cells/μWell were seeded onto the prepared AggreWell 400. Total media volume was adjusted to 1 ml by adding blastoid formation medium supplemented with 2 μM Y27632 (Gibco) before cell seeding. The cell seeding day was regarded as day 0 of blastoid formation. The plate was then centrifuged at 800g for 3 min and placed at 37 °C and 5% CO2 incubation condition. On day 1, the medium was replaced with fresh blastoid formation medium without Y27632. Subsequently, the medium was changed every 2-3 days. For the media changes, half of the total media volume was gently aspirated and replaced to avoid loss of the structures. On day 7 of blastoid induction, the structures were harvested using a 1000 μl pipette. The pipette tips were cut using sterile scissors to create a broader tip. To avoid attachment and loss of the structures, the cut pipette tip and 6-well plates were coated with 1% BSA in PBS. The blastoids were gently harvested and collected into 1.5ml tube coated with 1% BSA in PBS, followed by 1% BSA in PBS wash x2. The structures were fixed in 300 μl of 4% PFA for 15 min at RT. The fixed structures were stored in 1% BSA in PBS at 4°C for up to 1 month.

**Naïve conversion and primed conversion of OG2+/-GOF6+/- cell line**

5x105 Cells were seeded onto 0.5% gelatin coated dish in naïve culture media (supplemented with FBS, see above), a day before the naïve conversion or primed conversion. For naïve conversion, cells were cultured in serum-free naïve culture media -Ndiff227 supplemented with 0.1% Gentamycin (Gibco), 1,000 U/ml mouse leukemia inhibitory factor (mLIF) (Millipore, Sigma-Aldrich), 1 μM PD0325901 (Biogems) and 3 μM CHIR99021 (Biogems) for up to 3 days. For primed conversion, cells were cultured in EpiLC media 7, Ndiff227 supplemented with 0.1% Gentamycin (Gibco), 20ng/ml ActivinA (Peprotech), 12ng/ml bFgf (Peprotech) up to 96 hours. After 48 hours of primed conversion, the cells were passaged onto Matrigel (Corning# 354277) - coated dish. The cells were analyzed by flow cytometry at indicative timepoints during naïve conversion or primed conversion.

**Public data analysis**

Previous single-cell transcriptome sequencing data from somatic cell nuclear transfer embryos transitioning from oocyte to two-cell stage was downloaded from the Gene Expression Omnibus (GEO)8 repository (GSE70605) using sratoolkit v3.0.7 (<https://github.com/ncbi/sra-tools/wiki/01.-Downloading-SRA-Toolkit>). The raw data in FASTQ format was aligned to the mm10 using STAR aligner v2.7.10a9. Subsequent sorting and indexing of aligned reads were performed using samtools 10 with default parameters. The Subread package 11 was employed to generate a count matrix, which was analyzed using the DESeq2 package 12. For downstream analysis, only genes with non-zero counts in a minimum of four samples were included. Gene counts underwent variance-stabilizing transformation (vst) normalization using the default parameters prior to principal component analysis (PCA). Chromatin immunoprecipitation sequencing (ChIP-seq) data for pre-implantation embryos was downloaded from GEO (GSE73952) 13 and processed following the same initial steps as the transcriptome data. Mapped reads were subjected to peak calling using MACS2 14 with following parameters (‘-B -g mm -f BAMPE -q 1e-2 --broad --nomodel --SPMR’). To analyze combinatorial histone mark patterns for H3K4me3 and H3K27me3, ChromHMM v1.25 15 was employed according to the provided instruction 16. Emission labels identified by the ChromHMM LearnModel function were annotated into four biological categories: “unmarked”, “H3K27me3 only”, “H3K4me3 only” and “bivalent”. Genomic regions annotated as ‘unmarked’ in at least one sample were excluded from further analysis. For PCA, each biological label was further converted into numeric value (i.e., “H3K27me3 only” as +10, “H3K4me3 only” as -10, and “bivalent” as 0). PCA and subsequent visualizations were conducted using the factoextra R package (https://github.com/kassambara/factoextra), specifically the fviz_pca_ind function.

**RNA isolation and quantitative RT-PCR analysis**

Total RNA was extracted using Easy-BlueTM total RNA isolation kit (iNtRON Biotechnology). cDNA was synthesized using 5x PrimeScript TM RT mix (TaKaRa) for reverse transcription. Using 2x TB-Green premix (TaKaRa), quantitative real-time PCR was performed on a LightCycler-480II (Roche). The gene expression data was normalized using *Rn18s* as an internal loading control.

**Immunoblotting analysis**

The whole cell lysate was extracted using RIPA buffer (Biosesang) supplemented with 1 μM protease inhibitor and 10 μM sodium orthovanadate, followed by 1 hour incubation on ice and centrifugation. Protein concentration was determined using the Pierce BCA protein assay Kit (#23225, Thermo Fischer Scientific). The protein samples were mixed with 5x SDS-PAGE loading buffer (#SF2088-110-00, Biosesang) and heated at 100°C for 10 minutes. Total protein (10~20 μg) was separted on either 7.5% or 10% SDS-PAGE gels, then transferred to Methanol-activated PVDF membranes. The membranes were blocked with 5% skim milk in TBS-T for 1hour at room temperature, followed by overnight incubation at 4°C with primary antibodies (1:500 ~ 1:1000) diluted in TBS-T containing 1% sodium azide. After washing, membranes were incubated with secondary antibodies (1:10000 in TBS-T) for 1 hour at room temperature. The protein bands were visualized by Chemi-Doc using the Miracle-Star (#16028, iNtRON Biotechnology) chemiluminescence detection kit.

**RNA extraction for bulk RNA-seq**

For bulk RNA-seq, the old medium was removed and washed with 1x PBS twice before placing the plate on ice. Next, 1 ml of TRIzol (invitrogen) was added to the plate and incubated on ice for 2-3 min to facilitate cell detachment. The TRIzol with cells was transferred to a 1.5ml tube and incubated for 5 min at room temperature. 0.2 ml of chloroform (Sigma) was added to transferred TRIzol and shaken vigorously for 15 sec and incubated for 3 min at room temperature. After incubation, sample was centrifuged at 12,000g for 15 min at 4°C to separate the sample into three phases. The upper aqueous phase (~0.5-0.6 ml) was carefully transferred to a new 1.5ml tube. And 0.5 ml of isopropanol (Duksan) was added and shaken vigorously or vortexed and incubated for 10 min at room temperature. After incubation, sample was centrifuged at 12,000g for 10 min at 4°C and the RNA pellet was washed with 1 ml of 70% ice-cold ethanol (Sigma). Finally, the RNA pellet was dissolved in 20-30 μl of DEPC-treated water (invitrogen), the RNA concentration was measured, and the sample was stored at -80°C until use.

**Cell and library preparation for RNA-seq analyses**

Libraries for bulk RNA-seq were constructed using the TruSeq Stranded mRNA Library Prep Kit. For single-cell RNA-sequencing, cells cultured in 60 mm dishes were washed with pre-warmed Dulbecco's Phosphate-Buffered Saline (DPBS) (Gibco). Cells were then dissociated using Accutase (BD Biosciences) after a 3-minute incubation at 37°C. Following dissociation, cells were centrifuged and resuspended in DPBS for single-cell library construction. Library construction for single-cell RNA-sequencing was performed according to the 10X Chromium Next GEM Single Cell 3’ Reagent Kits v3.1 instructions. For each sample, 10,000 cells were targeted, and 10 cycles of amplification were performed for cDNA and library preparation. The libraries were sequenced on the Illumina NovaSeq6000 platform.

**Bulk RNA-seq data processing**

For bulk RNA-seq data, adaptor trimming was performed using Trimmomatic 17, and trimmed reads were aligned to the mm10 reference genome using HISAT2 18. Aligned reads were processed using the subread package 11 to generate count matrices. DESeq2 12 was used for further analysis, including normalization and differential expression analysis. Genes covered by at least 10 reads in more than two samples were included. Differentially expressed genes (DEGs) were identified with an adjusted *P* < 0.05 and a |log2FoldChange| > 1. Gene Ontology (GO) analysis for the DEGs was performed using clusterProfiler 19 with the enrichGO function. The statistical significance of the overlap between EPSC and M2KO DEGs was determined using a hypergeometric test. The representative factor (RF) was calculated as :
where the expected overlap was derived from the total number of genes detected across all bulk RNA-seq samples (*N* = 18,198). Gene Set Enrichment Analysis (GSEA) was performed using the fgsea 20 package v1.28.0 with the MSigDB 21 C5 (Biological Process) collection. The ranking metric was defined as the DESeq2 Wald statistic (*stat*). Global concordance was further validated by Pearson correlation of LFC values for significant DEGs, visualized as a four-quadrant scatter plot with linear regression. Pearson correlation coefficients (*R*) and linear regression lines were calculated using the ggpubr 22 package.

**Single-cell RNA-seq data processing**

Raw sequencing reads from scRNA-seq libraries were aligned to the GRCm38 (mm10) reference genome using CellRanger 23 v6.1.2 (10x Genomics, Pleasanton, CA). Sparse data matrices generated by the CellRanger pipeline were processed further in R 4.3.2 using the Seurat v5 24. Quality control included the removal of cells with mitochondrial content >20% and identification of doublets using DoubletFinder 25. To correct for batch effects between samples, Harmony 26 was used. Post batch correction, log normalization with a scale factor of 10,000 was performed on the count matrix. PCA was conducted, followed by dimension reduction using Uniform Manifold Approximation and Projection (UMAP) based on the first 10 principal components (PCs). Clusters of cells were identified using Seurat's default shared nearest neighbor (SNN) modularity optimization method. To calculate the abundance of the TE-like population, the number of cells belonging to the cluster 4 was divided by the total number of cells for each genotype.

**Trajectory and regulon analyses**

Trajectory analysis was performed using Monocle3 27 to elucidate the developmental course across three cell types in the single-cell RNA-sequencing dataset. Cells were colored by pseudotime scores for visualization on the UMAP projections. DEGs along the pseudotime were identified by fitting a regression model to each gene. Regulon analysis was conducted using pySCENIC 28 in Python and SCENIC v1.3.1 29 in R for integration with Seurat objects. Raw count matrices and cell metadata were converted to loom format compatible with pySCENIC. The GRNBoost2 algorithm was used to define regulons 28, which were further refined by filtering targets with significant enrichment for corresponding transcription factor (TF) motifs. The cellular activity of these regulons was calculated using the AUCell function and integrated with Seurat for further analysis 29. Differential regulons for each cell type were identified using Seurat's FindAllMarkers function with a logFC threshold of 0.3 24. Regulon activities were scaled for heatmap plotting. TFs representing each regulon cluster were subjected to gene set enrichment analysis, specifically with the 'org.Mm.eg.db' database and 'Biological Process' ontology 30, 31.

# **Benchmarking of mouse embryo scRNA-seq data**

# For the benchmarking of our scRNA-seq data to the *in vivo* embryo counterparts, published expression matrices of mouse embryos (GSE45719 32, GSE84892 33, GSE100597 34, GSE123046 35) were collected. Embryonic stages were obtained from the original studies. Data for cells beyond E4.5 in Mohammed et al. 34 and Nowotschin et al. 35 were excluded. For the SMART-seq data from Deng et al. 32, the expression profiles derived from embryonic lysates, adult fibroblast, and liver were excluded. In the 10x-sequenced dataset from Nowotschin et al. 35, cells with < 2000 detected genes, and >10% mitochondrial content were excluded. Due to the large cell count compared to the other datasets, we aggregated the raw gene expression matrix of this dataset based on the neighborhood computation by miloR 36, instead of performing random downsampling. The neighborhood-based aggregation preserves the biological variation of the original data and mitigate sparsity and low sequencing depth, which are intrinsic to 10x single-cell datasets 37. Since the gene symbol formats used in the matrices were heterogeneous among datasets, gene symbols were first converted into Ensembl IDs based on the reference genome version used for alignment in each study. After merging, these Ensembl IDs were converted back to gene symbols using GRCm38 (Ensembl 2020 ver.) 38. Genes expressed in fewer than 3 cells were removed. The workflow from batchelor R package was implemented for integration 39. Per-batch scaling normalization was performed on the raw expression values of the merged dataset using multiBatchNorm function39. Dimensionality reduction was performed with 2,500 highly variable genes identified with Seurat’s SelectIntegrationFeatures function40, followed by MNN-based batch correction with fastMNN39 with the k-value of 15. 2D UMAP embedding was calculated with built-in umap function from uwot R package ([https://CRAN.R-project.org/package=uwot](https://cran.r-project.org/package=uwot)) using 8 principal components. We identified clusters with Seurat’s FindNeighbors40 and FindClusters functions40. Then we annotated them using embryonic lineage marker expression profiles, after correcting log-expression values using batchelor’s mnnCorrect function 39. Trajectory analysis was performed with monocle3 41. Query data projection was performed as previously described (Zhao *et al*. 37) with minor changes. For large (>500 cells) datasets, we used the same miloR aggregation approach 36 for down sampling. MNN pairs between query and reference were identified and filtered based on expression profile correlation. Corrected PC values of the query data were calculated based on the estimation of batch effects between MNN pairs. This approach ensures the positioning of the query data proximal to the cells in the reference cells with the most similar transcriptomic profiles. To compare WT, EPSC, and M2KO samples, the projection profiles of these samples were merged together with the reference embryos dataset. Published *in vitro* EPSC and TSC datasets were included as controls (Posfai *et al*.42, Angelova *et al*.43, Aldeguer *et al*. (<https://doi.org/10.1101/510362>)). Pseudotime assignment was performed over the *in vivo* Zygote-EPI and Zygote-TE branches using monocle3 41. Expression correlation distances between query and reference were calculated based on pseudo-bulk log-normalized expression values. Pairwise Pearson correlations, computed with built-in cor() function (R 4.2.0), were converted to distance metrics (1-correlation), and scaled via min-max normalization. For DEG analysis between 3 clusters, public *in vitro* datasets were excluded to focus on the variation within our experimental data. To minimize batch effects in DEG analysis between 3 clusters, WT sample matched in batch with other groups were used. Seurat’s FindAllMarkers function was used with ‘wilcox’ option, with the ‘Late ICM’ cluster downsampled to 100 cells40. Analyses were run with 100 permutations, to derive the average adjusted p-value and log2 fold change value. Genes with average adjusted p-value >=0.05 were discarded. Top 200 genes by average log2 fold change values were used for heatmap visualization, with scaled pseudo-bulk values. GO enrichment was performed using enrichGO function of clusterProfiler 44.

**Immunofluorescence staining of Blastoids**

The fixed structures were permeabilized in 0.2% Triton X in PBS for 10-15 min at RT, followed by PBST (1% Tween 20 in PBS) wash x2. Then the structures were blocked in PBS-5%BSA for 1h at RT. Primary antibodies were diluted in 0.5% BSA in PBST were incubated with the structures for O/N, at 4°C. The structures were then washed twice in PBST (1% Tween 20 in PBS). Secondary antibodies (1:500) diluted in 0.5% BSA in PBST were incubated with the structures for 3h, at RT. Nuclei were counterstained with DAPI at 100 ng/ml. The structures were washed with PBST x2, then gently loaded onto a confocal dish using pipette tips coated with 1% BSA in PBS. The solution was aspirated as much as possible, to allow the structures to adhere to the confocal dish. Then PBS was added to prevent drying. The primary antibodies and dilution ratios used are listed as following: anti-CDX2(1:250, Abcam, ab76541), anti-CDX2(1:150, Biogenx, Mu392A), anti-CK8(1:250, DSHB, TROMA1), anti-FOXA2(1:250, Abcam, ab108422), anti-Gata4(1:200, Santa Cruz Biotechnology, sc-25310), anti-E-cadherin(1:300, Cell Signaling Technology, 3195s). The secondary antibodies and dilution ratios used are listed as following: Alexa Fluor 405 Donkey anti-Rabbit IgG (H+L) (Invitrogen, A-48258), Alexa Fluor 647 Donkey anti-Rabbit IgG (H+L) (Invitrogen, A-31573), Alexa Fluor 647 Donkey anti-Mouse IgG (H+L) (Invitrogen, A-31571), Alexa Fluor 647 Goat anti-Rat IgG (H+L) (Invitrogen, A-21247). **Immunostaining of Trophoblast Stem Cells**

Round glass non-coated coverslips (Deckgläser) were coated with 0.5% porcine gelatin before seeding. Cells were seeded on coverslips and adapted to 2i/LIF media or EPSCM for 2 more days. After 4 days of TSC partial induction, coverslips were fixed with 4% paraformaldehyde for 10 min at RT, followed by permeabilization in 0.1% Triton X in PBS for 10 min at RT. Fixed cells were blocked in 3% BSA in PBS 1hr at RT or O/N at 4°C. The solution was aspirated, cells were incubated with specific primary and secondary antibodies for each 1hr at RT. The primary antibodies and dilution ratios used are listed as following: anti-CK8 (1:250, Sigma-Aldrich, ZRT1399). Secondary antibodies and dilution ratios used are listed as following: Alexa Fluor 647 anti-Rat IgG (H+L) (1:200, Cell Signaling, 4418S). Fluorescence images were examined with a TCS 8 confocal microscope (LEICA).

**Teratoma Formation assay**

For teratoma formation assays, 7.5 × 10^5 of WT, M2KO#2, M2KO#8, EPSC cells were harvested and injected both subcutaneously (S.C. injection) and intratesticularly (I.T. injection) into BALB/c nude mice. Mice were euthanized 6 weeks post-injection, and teratomas were harvested and fixed in 10% neutral-buffered formalin (Biosesang) at 4°C. Fixed tissues were embedded in paraffin. After sectioning, hematoxylin and eosin (H&E) staining were performed for histological analysis.

**Nuclei isolation for CUT&Tag sample**

After growing the cells to 70-80% confluency, media was removed from cell plate by suction. Freshly prepared conditioned media containing 0.1% formaldehyde (Sigma-Aldrich) was added and incubated at room temperature for 1 min. Subsequently, 500 μl of 2.5M glycine (GoldBio) was added dropwise, and the plate was placed on a shaker for 3 min. Cells were washed with 1x PBS, then 0.1% Trypsin-EDTA (Gibco) was added, and incubated at 37°C, CO2 incubator for 3 min. Any remaining cells were detached by tapping the plate, and conditioned media with 4 volumes of trypsin was added to inhibit enzyme activity. Cells were dispersed using a pipette-aid, centrifuged at 600g for 3 min at room temperature, and the supernatant was removed. The pellet was resuspended in 5 ml of cold Nuclear Extraction (NE) Buffer (20 mM HEPES (GoldBio) pH 7.9, 10 mM KCl (Duksan), 0.1% Triton X-100 (Duksan), 20% Glycerol (Daejung), 0.5mM Spermidine (Sigma-Aldrich), Protease inhibitors) and incubated on ice for 10 min. Next, the sample was filtered through a 30 μm strainer (Miltenyi Biotechnology) to remove aggregates and centrifuged at 600g for 3 min at 4°C to remove supernatant. The nuclei sample was aliquoted into cryovials and frozen slowly in a deep freezer using a cell freezing container.

**CUT&Tag and library preparation**

CUT&Tag was performed based on Epicypher’s protocol. First, Concanavalin A (ConA) Paramagnetic Beads (Epicypher) were activated to bind nuclei sample using Bead Activation Buffer (20mM HEPES pH 7.9, 10mM KCl, 1mM CaCl2 (Duksan), 1mM MnCl2 (Duksan)). Activated ConA beads were incubated with 50,000 nuclei for 10 min at room temperature. Next, primary antibody was added to the nuclei-bead mixture in cold Antibody150 Buffer (20mM HEPES pH 7.5, 150mM NaCl (Duksan), 0.5mM Spermidine, Protease inhibitors, 0.01% Digitonin (Sigma-Aldrich), 2mM EDTA pH 8.0 (Thermo Scientific)) and incubated using a nutator overnight at 4°C. After the primary antibody was removed, secondary antibody mixture was added to nuclei-bead mixture in cold Digitonin 150 Buffer (20mM, HEPES pH 7.5, 150mM NaCl, 0.5mM Spermidine, Protease inhibitors, 0.01% Digitonin) and incubated using nutator during 30 min at room temperature. The nuclei-bead mixture was washed with Digitonin 150 Buffer three times and Digitonin 300 Buffer (20mM, HEPES pH 7.5, 300mM NaCl, 0.5mM Spermidine, Protease inhibitors, 0.01% Digitonin) was added before adding CUTANA pAG-Tn5 (Epicypher). CUTANA pAG-Tn5 pre-loaded with Illumina adapters was added to reactions and incubated in Digitonin 300 Buffer to bind antibody-labelled chromatin on a nutator for 1hr at room temperature. The nuclei-bead mixture with CUTANA pAG-Tn5 was activated with Tagmentation Buffer (20mM HEPES pH 7.5, 300mM NaCl, 0.5mM Spermidine, Protease inhibitors, 0.01% Digitonin and 10mM MgCl2 (Duksan)) for 1hr at 37℃ thermocycler. After washing three times with Digitonin 300 Buffer, reactions were stopped with TAPS Buffer (10mM TAPS pH 8.5 (Sigma-Aldrich) and 0.2mM EDTA) and quenched with SDS Release Buffer (10mM TAPS pH 8.5, 0.1% SDS (Enzynomics)) for 1hr at 58℃ thermocycler. SDS was neutralized with SDS Quench Buffer (0.67% Triton X-100). Finally, non-hot start PCR amplification was performed directly on the reaction mixture using universal i5 (Macrogen) and barcoded i7 primers (Macrogen), CUTANA High Fidelity 2x PCR Master Mix (Epicypher), and the DNA was purified using 1.3x AMPureXP beads (Beckman coulter).

**CUT&Tag sequencing and data analysis**

CUT&Tag libraries were performed library quality check using an TapeStation HS D5000 Screen Tape (Agilent Technologies) to assess fragment size and DNA quality before proceeding to Illumina sequencing. Samples that passed the quality check were proceeded to paired-end Illumina sequencing using NovaSeq6000 (Illumina). Raw reads were trimmed for adaptor sequences using Trimmomatic v0.38 17 and aligned to the mm10 reference genome using Bowtie2 v2.5.1 45. Duplicate reads were removed with Picard v0.118 (<https://broadinstitute.github.io/picard/>). Mapped reads overlapping blacklist regions were removed prior to downstream analyses. We combined the ENCODE mouse blacklist (<https://github.com/Boyle-Lab/Blacklist>) and a CUT&RUN/CUT&Tag–specific blacklist46 and filtered reads with bedtools47 intersect function. Blacklist-filtered BAMs were used for all subsequent steps. Filtered reads were used to generate bigwig files using deepTools48 bamCoverage with binSize set to 50, effectiveGenome size of 2,652,783,500 for RPGC normalization, and ignoreDuplicates set to TRUE. These bigwig files were used as input for deepTools computeMatrix and plotHeatmap. For gene-centric heatmaps, reference-point mode with referencePoint TSS option was used with -b 3000 and -a 3000, alongside a bedfile corresponding to mm10 total genomic regions with skipZeros set to TRUE. Peak calling was performed with MACS2 14. H3K27me3 CUT&Tag data peak calling was conducted with the broad option, while Mtf2 and H3K4me3 CUT&Tag data were called using the narrow option with a -q value of 1e-2. For peak annotation, MACS2 peak files were supplied to ChIPseeker49. TSS windows were set to ±1.5 kb and bar plots were generated with plotAnnoBar. PCA was performed using DiffBind v3.12.0 in R 50 on the read-count matrix derived from the merged peak set for each antibody, with library-size normalization to correct for technical batch effects while preserving biological variation. The same DiffBind framework with the DESeq2 method was used to identify differential H3K27me3 and H3K4me3 peaks for the contrasts M2KO vs WT and EPSC vs WT (FDR < 0.1, |log2 fold change| > 1). Differential peaks were annotated with ChIPseeker (TSS window = ±1.5 kb), and a gene-level chromatin status was assigned by selecting, for each gene, the most significant peak (highest |Fold|, lowest FDR). For H3K27me3, all annotation categories except "Distal Intergenic" were retained to accommodate its broad distribution; for H3K4me3, only peaks annotated to "Promoter" regions were retained. Genes were classified as positive for H3K27me3 loss (Fold < −1) or H3K4me3 gain (Fold > 1) based on their representative peak.

To identify Mtf2-dependent loci, we first merged all Mtf2 peak sets across WT and M2KO replicates using bedtools47 merge function. Mean Mtf2 signal was computed per region for WT (rep1 and 2) and M2KO (M2KO#2 rep1, 2 and M2KO#8 rep1, 2) using deepTools multiBigwigSummary on the merged peak bedfile. The M2KO mean signal was calculated as a hierarchical mean: replicates were averaged within each clone, and the two clone means were then averaged to assign equal weight to both clones. Regions with significant Mtf2 binding loss in M2KO relative to WT—defined as log2((WT_signal + 1) / (M2KO_signal + 1)) ≥ 1.5—were retained as "Mtf2-dependent regions".These “Mtf2-dependent regions” were then used as references for heatmaps of Mtf2, H3K27me3, and H3K4me3 profiles. For these plots, computeMatrix reference-point --referencePoint center -b 3000 -a 3000 --binSize 50 --missingDataAsZero was applied to the bigwig files of all samples, followed by plotHeatmap with default clustering. Mtf2 binding loss in EPSC relative to WT was defined analogously, using the union of WT and EPSC Mtf2 broad peaks as the universe and applying the same log2 fold-change threshold of ≥1.5. Mtf2-loss regions were intersected with mm10 gene-body coordinates (GENCODE vM23) using bedtools intersect, and overlapping genes were called as ‘MTF2 loss positive’ in the corresponding cell type.

To test whether specific chromatin features are enriched in M2KO-upregulated TSC-related genes, we defined four mutually exclusive gene sets within the expressed-gene universe (n = 18,198 genes with non-NA adjusted P value in the M2KO-vs-WT DESeq2 result): Set A, M2KO-up DEGs that are also TSC-up DEGs (n = 612); Set B, M2KO-up DEGs not in the TSC signature (n = 1,568); Set C, TSC-up DEGs not upregulated in M2KO (n = 2,003); Set D, all expressed genes. TSC-up DEGs (n = 2,615) were obtained from GSE159181 (ESC vs TSC). For each set and each chromatin feature (H3K27me3 loss, MTF2 loss, H3K4me3 gain), the fraction of feature-positive genes was computed, and statistical enrichment was assessed by Fisher's exact test (one-sided "greater") for Set A vs Set B / C / D, with Benjamini–Hochberg correction within each comparison. Two-sided Fisher's exact test was used to compute odds ratios with 95% confidence intervals. To compare chromatin redistribution between M2KO and EPSC, the gene sets defined for each chromatin feature in the two cell types were tested for overlap by Fisher's exact test against the same expressed-gene universe (n = 18,198). Joint distributions of chromatin features were visualized with the UpSet function in ComplexHeatmap, and pairwise overlaps with the VennDiagram51 package.

For locus-level visualization of CUT&Tag and RNA-seq signal at selected genes, RPGC-normalized bigwig files were imported using rtracklayer52, and per-bin signal was computed within a strand-aware window of TSS −1 kb to +3 kb (200 equal-width bins, smoothed with a 5-bin centered moving average using zoo::rollmean). All replicates within each group (WT: 2 replicates; EPSC: 2 replicates; M2KO: 4 replicates from clones #2 and #8) were averaged to produce a single trace per group × antibody, and the y-axis was scaled per antibody to the 99.5th percentile of all values across the three groups. RNA-seq panels show DESeq2 size-factor-normalized counts as mean ± standard deviation; gene models depict the longest transcript per gene from TxDb.Mmusculus.UCSC.mm10.knownGene. Panels were assembled using ggplot2 and patchwork.

**Re-analysis of public transcriptomic datasets following PKC inhibition**

To investigate the effect of Protein Kinase C (PKC) inhibition on the transcriptomic landscape and PRC2-mediated epigenetic regulation across species, we re-analyzed publicly available RNA-seq datasets of human and mouse ESCs. Human naïve ESC data were retrieved from the Gene Expression Omnibus (GEO) under accession number GSE153212. This dataset comprises two hESC lines (H9 and WIBR3) cultured under primed conditions and under naïve conditions with or without the PKC inhibitor Gö6983, providing a comparative framework for assessing the effect of PKC inhibition (sample composition shown in Fig. S7E). For mouse ESCs, transcriptomic data from cells cultured in 2i/LIF or PKCi-containing media were obtained from a previously published study 53.

Raw read counts were normalized using the variance-stabilizing transformation (VST) implemented in the DESeq2 package. To emphasize biological differences across pluripotent states and to mitigate technical variation arising from different cell lines and sequencing platforms, batch effect correction was performed using the removeBatchEffect function in the limma package; the biological group (culture condition) was retained as the variable of interest while cell line and platform were treated as batch covariates. Principal component analysis was performed on the batch-corrected VST values using the top 500 most variable genes (Fig. S7A for the mouse dataset; Fig. S7F for the human dataset).

Expression levels of core PRC2 subunits—*EZH1* and *EZH2* in the human dataset, and *Mtf2* and *Ezh2* in the mouse dataset—were extracted from the normalized and batch-corrected counts. For the human dataset, *EZH1* and *EZH2* expression was compared across primed, (−)PKCi naïve, and (+)PKCi naïve conditions (Fig. S7G). For the mouse dataset, *Mtf2* and *Ezh2* expression was compared between 2i/LIF and PKCi-containing conditions (Fig. S7B). Statistical significance was assessed using pairwise t-tests for the human dataset (multiple comparisons among three conditions) and unpaired t-tests for the mouse dataset (two-condition comparison), as indicated in the corresponding figure legends.

**Statistical analysis**

Statistical analysis between two groups were performed using Student’s *t*-test, and in case of three or more groups with single variable, one-way analysis of variance (ANOVA) followed by Bonferroni comparison test was conducted. Two-way ANOVA was performed for groups with two or more variables. Dunnett’s multiple comparison test was performed in case of comparing experimental groups with single control group. Significance was set as P < 0.05 (*), P < 0.01 (**), P < 0.001 (***), P < 0.0001 (****). Error bars represent mean ± s.d.

**Data Availability**

The scRNA-seq, bulk RNA-seq and CUT&Tag datasets generated in this study have been deposited in the Gene Expression Omnibus (GEO) under the accession codes GSE306591 (scRNA-seq of *in vitro* cell models), GSE306592 (bulk RNA-seq of *in vitro* cell models) and GSE306593 (CUT&Tag of in vitro cell models profiling H3K27me3, MTF2 and H3K4me3). Publicly available datasets reanalyzed in this study were downloaded as provided by Liu *et al.* (GEO: GSE7395213 and GSE7060554), Deng *et al.*32 (GEO: GSE45719), Posfai *et al.* (GEO: GSE8489233 and GSE14560942), Mohammed *et al*.34 (GEO: GSE100597), Nowotschin *et al.35* (GEO: GSE123046), Chen *et al.55* (GEO: GSE74155), Angelova *et al.43* (ENA: PRJEB68188) and Frias-Aldeguer *et al.56* (GEO: GSE127754). The mouse reference genome (mm10, NCBI build 10) was obtained from the Genome Reference Consortium (https://www.ncbi.nlm.nih.gov/datasets/genome/GCF_000001635.20/), the gene annotation file from GENCODE (<https://www.gencodegenes.org/mouse/release_M10.html>), the ENCODE mm10 blacklist from Amemiya *et al.57* (https://github.com/Boyle-Lab/Blacklist/blob/master/lists/mm10-blacklist.v2.bed.gz), and the CUT&RUN-specific mm10 blacklist from Nordin *et al.46* All other data supporting the findings of this study are available from the corresponding authors on reasonable request.

**Extended data Figure legends**

**Extended data Figure 1 Dual reporter ESCs model for naïve and primed transition** (A) Graphical illustration of heterozygous Oct4-∆PE-GFP allele, and Oct4-∆DE-RFP allele (top left), flow cytometry data using OG2 GOF6 cell line (bottom left). Representative fluorescent images and graphical illustration of OG2 GOF6 cell line recapitulating naïve, intermediate, and primed pluripotent status (scale bars = 200 μm) (middle, right). [PE: Proximal Enhancer, DE: Distal Enhancer] (B) Relative mRNA expressions for naïve pluripotency marker genes (*Dppa3, Klf2, Esrrb, Rex1 and Klf4*) during either naïve or primed conversion, (n = 3). (C) Relative mRNA expressions for primed pluripotency marker genes (*Fgf5, Cer1, Otx2*) during either naïve or primed conversion, (n = 3). (D) Relative mRNA expressions for core pluripotency marker genes (*Sox2, Nanog, Pou5f1*) during either naïve or primed induction, (n = 3). (E) Representative fluorescence images for OG2 GOF6 cells cultured under serum/LIF+2i condition (Left) and Fgf2+ActivinA condition (right) (scale bars = 250 μm). (F) Relative mRNA expressions for naïve pluripotency marker genes (*Rex1, NrOb1, Klf2, Klf4, Esrrb*) of four indicative populations, (n = 3). (G) Relative mRNA expressions for primed pluripotency marker genes (*Otx2, Fgf5, Cer1*) of four indicative populations, (n = 3).

**Extended data Figure 2 Establishment of M2KO and J2KO ESCs** (A) Graphical outline for generation and validation of Mtf2 KO (hereafter, M2KO) (top left). Graphical outline for generation and validation of Jarid2 KO (hereafter, J2KO), exon 3 (142 bp) was deleted using two gRNAs targeting the flanking intronic regions (bottom left). T7 Endonuclease I assay for WT and M2KO pool (top middle). Sanger sequencing chromatograms of WT and individual M2KO clones with PAM sequence highlighted (top right). T7 Endonuclease I assay for WT and J2 KO pool (bottom middle). Sanger sequencing chromatograms of WT and individual J2KO clones with complementary PAM sequence highlighted (bottom right). FP, forward primer; RP, reverse primer. (B) Representative brightfield images of OG2 GOF6 WT, M2KO#2, M2KO#8, J2KO#52, and J2KO#56 (scale bars = 500 μm). (C) Graphical illustration indicating epigenetic barriers from naïve pluripotency to differentiation in WT, M2KO and J2KO.

**Extended data Figure 3 Differentiation to TSCs** (A) Graphical summary of embryonic developmental stages (B) Principal Component Analysis (PCA) of RNA-seq data across eight distinct embryonic developmental stages (C) PCA of ChIP-seq data across seven different stages, emphasizing the bivalency pattern of H3K27me3 and H3K4me3 profiles. The color bar in the right panel indicates the quality of representation for each variable on the factor map, determined by squared cosine. (D) Violin plot of FPKM values of indicative genes (*Mtf2* and *Jarid2*) at indicative stages of embryo (n = 4, 5, 6) ( **, p < 0.01, ****, p < 0.0001, n.s. for non-significant). (E) Relative fluorescence images at indicative days during EPSC induction (scale bars = 500 μm). (F)Representative bright field images of EPSC, WT, M2KO#2, M2KO#8, J2KO#52 and J2KO#56 (scale bars = 200 μm, top panels, scale bars = 50 μm, bottom panels) after 4 days of partial TSC induction. (G) Relative mRNA expressions for TSC marker genes (*Gata2*, *Gata3*, *Krt8*, *Krt18*) in EPSC, WT, M2KO, and J2KO at Day 0 and Day 4 of partial TSC induction. Two-way ANOVA, multiple comparisons (****, p < 0.0001), (N=1, n = 3). (H) Flow cytometry data of EPSCs and TSCs (left), quantification of each population (right), (N = 1, n = 3). (I) Quantification of each indicative cell population of flowcytometry data at day4 of TSC partial induction (****, p < 0.0001, n.s. for non-significant), (N = 1, n = 3).

**Extended data Figure 4 Transcriptome analysis** (A) PCA of scRNA-seq data. (B) PCA of bulk RNA-seq data. (C) UMAP feature plots showing the normalized expression of representative trophectoderm (TE) markers (*Krt8, Krt18, Gata2*) and the totipotency-associated marker (*H19*) in the experimental single-cell dataset, highlighting their localized and specific enrichment within cluster 4. (D) GO terms significantly enriched (*P*adj < 0.05) for TFs comprising “ESC-active” regulon clusters, identified by gene set enrichment test. (E) UMAP plot of integrated scRNA-seq data from *in vivo* mouse embryos, showing the expression of key marker genes for early embryonic lineages. (F) UMAP projection of public single-cell datasets for *in vivo* embryo data (left) and *in vitro* stem cell data (right), onto the integrated embryonic reference. (G) Heatmap of pairwise correlation distance metrics between transcriptomic profiles of *in vitro* clusters and *in vivo* embryonic data stratified by embryonic stage and lineage. (H) UMAP projection of WT, M2KO, and EPSC cells mapped onto the integrated in vivo embryo data, with projected cells highlighted in red. Rectangles on the bottom provide zoomed-in views of cells localized within the early TE and early ICM clusters. (I) Bar plot showing the proportion of clusters from Extended data Fig.4C mapped to each identified cluster. (J) Differential gene expression analysis between clusters within experimental dataset. (K) Dot plot with representative differentially expressed genes (DEGs) for each cluster. (L) Five enriched Gene ontology (GO) terms associated with the DEGs from (K) are displayed.

**Extended data Figure 5 Establishment of blastoid** (A) Representative brightfield and brightfield/GFP/RFP images of structures derived from EPSC, WT, M2KO, and J2KO on blastoid formation day 7, on AggreWell. White arrows indicate cavitations of M2KO (scale bars = 200 μm). (B) Representative Brightfield and brightfield/GFP/RFP images of structures derived from EPSC, WT, M2KO, and J2KO on blastoid formation day 7, harvested from AggreWell. Red arrows indicate cavitations of M2KO (scale bars = 200 μm). (C) Representative brightfield and brightfield/GFP/RFP images of criteria for quantification of structures. (D) Representative brightfield/GFP/ RFP images of EPSC and WT with or without iEzh2 treatment, on day 7 of blastoid formation (scale bars = 200 μm). (E) Quantification of ‘Cavitation’ and ‘Blastoid’ structures derived from EPSC, WT without iEzh2, and WT with iEzh2 on blastoid formation day 7. Total 535 structures of WT mock, 535 structures of WT +iEzh2, and 617 structures of EPSC were analyzed. Each point represents the percentage of ‘Cavitation’ and ‘Blastoid’ structures in a single imaged field (27 fields for each of WT mock and WT+iEzh2, and 31 fields for EPSC). Mixed-effects analysis, Multiple comparisons, (****, p < 0.0001, **, P < 0.01, N=3, n=27, 31). (F-G) Immunofluorescence staining of structures derived from EPSC, WT without iEzh2, WT with iEzh2 on day 7 of blastoid formation for Cdx2 and DAPI (F) and for E-cadherin (G) (scale bars = 50 μm).

**Extended data Figure 6 Integrated transcriptomic and epigenomic analyses** (A) PCA of CUT&Tag peak profiles for Mtf2, H3K27me3, and H3K4me3 in four different conditions. For Mtf2 (left), PCA was performed specifically using Mtf2-dependent signals; for H3K27me3 (middle) and H3K4me3 (right), PCA was performed using global peak profiles. (B) Genomic distribution of Mtf2, H3K27me3, and H3K4me3 peaks across promoters, UTRs, exons, introns, downstream (≤300 bp), and distal intergenic regions. (C) Mtf2, H3K27me3 and H3K4me3 CUT&Tag and RNA-seq genome browser tracks of *HoxA* (left) and *HoxD* (right) clusters in 4 different conditions. (D) Quantitative overlap analysis of differentially expressed genes (DEGs) between EPSC vs. WT and M2KO vs. WT. The number of overlapping genes (n), Representation Factor (RF), and hypergeometric *P*-values are indicated. Color scale represents log10(RF). (E) Heatmap of TSC-signature genes (n=2,615 TSC-up DEGs from GSE159181, ESC vs TSC) in the public dataset (left) and our RNA-seq data (right). Expression is shown as Z-scored counts. (F) Upset plots showing joint distribution of three chromatin features (H3K27me3 loss, Mtf2 loss, and H3K4me3 gain) within Set A (top, M2KO-up & TSC-up; n=612) and Set B (bottom, M2KO-up & not TSC-up; n=1,568). Vertical bars indicate the number and percentage of genes in each combination; right horizontal bars indicate marginal totals per mark. (G) Mark-wise overlap of differentially affected genes between M2KO and EPSC for each chromatin feature: H3K27me3 loss (left), Mtf2 loss (middle), and H3K4me3 gain (right). Each feature was defined relative to WT in the corresponding cell type. Odds ratios and one-sided Fisher’s exact-test *P* values were calculated against the universe of expressed genes (n=18,198).

**Extended data Figure 7 PKC inhibition attenuates Mtf2-PRC2 activity in naïve pluripotency** (A) Principal component analysis of bulk RNA-seq from a published mouse ESC dataset. Cells cultured under conventional 2i/LIF (blue) and Gö6983-containing PKCi conditions (red) form transcriptionally distinct clusters along PC1 (98.9% of variance). (B) Mtf2 and Ezh2 expression in the same dataset, shown as variance-stabilizing transformed (VST) normalized counts. Both genes are significantly downregulated upon PKCi treatment (unpaired t-test; ****, *P* < 0.0001). (C) mRNA expressions for naïve pluripotency marker genes (*Rex1, Esrrb*) and primed pluripotency marker genes (*Cer1, Fgf5*) of primed, naïve and naïve-converted primed with Gö6983 (2.5µM) under serum LIF+2i condition, One-way ANOVA, multiple comparisons, (*, p < 0.05, ****, p < 0.0001, n.s. for non-significant). (N = 1, n = 3). (D) Immunoblotting analysis for indicative proteins (H3K27me3, Ezh2, Mtf2, pStat3) in primed, naïve and naïve-converted primed mESC with PKC inhibitor Gö 6983(2.5µM). β –actin was used as a loading control. (E) Sample information for the human naïve ESC bulk RNA-seq dataset (GSE153212). Samples cover two cell lines (H9, WIBR3) and three pluripotent states: primed, (−)PKCi naïve, and (+)PKCi naïve. Key small-molecule supplements are listed for each condition. (F) Principal component analysis of the human naïve ESC dataset in (E), performed on the top 500 most variable genes after VST and limma-based batch correction across cell lines and platforms. Samples are colored by culture condition (primed: gray; (−)PKCi naïve: blue; (+)PKCi naïve: red) and shaped by cell line (circle: H9; triangle: WIBR3). (G) EZH1 and EZH2 expression in the human naïve ESC dataset, shown as VST-normalized and batch-corrected counts. EZH2 is significantly downregulated in (+)PKCi naïve hESCs relative to (−)PKCi naïve, whereas EZH1 is comparable. Pairwise t-tests (**, P < 0.05, ns, non significant).

**References**

1. Park, J.-C., Kim, K.-T., Jang, H.-K. & Cha, H.-J. Transition substitution of desired bases in human pluripotent stem cells with base editors: a step-by-step guide. *International Journal of Stem Cells* **16**, 234-243 (2023).

2. Oksuz, O. *et al.* Capturing the Onset of PRC2-Mediated Repressive Domain Formation. *Mol Cell* **70**, 1149-1162 e1145 (2018).

3. Kim, K.T. *et al.* Safe scarless cassette-free selection of genome-edited human pluripotent stem cells using temporary drug resistance. *Biomaterials* **262**, 120295 (2020).

4. Yang, J. *et al.* Establishment of mouse expanded potential stem cells. *Nature* **550**, 393-397 (2017).

5. Dong, C. *et al.* Derivation of trophoblast stem cells from naive human pluripotent stem cells. *Elife* **9** (2020).

6. Li, R. *et al.* Generation of Blastocyst-like Structures from Mouse Embryonic and Adult Cell Cultures. *Cell* **179**, 687-702 e618 (2019).

7. Hayashi, K., Ohta, H., Kurimoto, K., Aramaki, S. & Saitou, M. Reconstitution of the mouse germ cell specification pathway in culture by pluripotent stem cells. *Cell* **146**, 519-532 (2011).

8. Edgar, R., Domrachev, M. & Lash, A.E. Gene Expression Omnibus: NCBI gene expression and hybridization array data repository. *Nucleic Acids Res* **30**, 207-210 (2002).

9. Dobin, A. *et al.* STAR: ultrafast universal RNA-seq aligner. *Bioinformatics* **29**, 15-21 (2013).

10. Li, H. *et al.* The Sequence Alignment/Map format and SAMtools. *Bioinformatics* **25**, 2078-2079 (2009).

11. Liao, Y., Smyth, G.K. & Shi, W. The Subread aligner: fast, accurate and scalable read mapping by seed-and-vote. *Nucleic Acids Res* **41**, e108 (2013).

12. Love, M.I., Huber, W. & Anders, S. Moderated estimation of fold change and dispersion for RNA-seq data with DESeq2. *Genome Biol* **15**, 550 (2014).

13. Liu, X. *et al.* Distinct features of H3K4me3 and H3K27me3 chromatin domains in pre-implantation embryos. *Nature* **537**, 558-562 (2016).

14. Zhang, Y. *et al.* Model-based analysis of ChIP-Seq (MACS). *Genome Biol* **9**, R137 (2008).

15. Ernst, J. & Kellis, M. ChromHMM: automating chromatin-state discovery and characterization. *Nat Methods* **9**, 215-216 (2012).

16. Ernst, J. & Kellis, M. Chromatin-state discovery and genome annotation with ChromHMM. *Nat Protoc* **12**, 2478-2492 (2017).

17. Bolger, A.M., Lohse, M. & Usadel, B. Trimmomatic: a flexible trimmer for Illumina sequence data. *Bioinformatics* **30**, 2114-2120 (2014).

18. Kim, D., Paggi, J.M., Park, C., Bennett, C. & Salzberg, S.L. Graph-based genome alignment and genotyping with HISAT2 and HISAT-genotype. *Nat Biotechnol* **37**, 907-915 (2019).

19. Yu, G., Wang, L.G., Han, Y. & He, Q.Y. clusterProfiler: an R package for comparing biological themes among gene clusters. *OMICS* **16**, 284-287 (2012).

20. Korotkevich, G. Fast gene set enrichment analysis. *bioRxiv* (2021).

21. Liberzon, A. *et al.* The Molecular Signatures Database (MSigDB) hallmark gene set collection. *Cell Syst* **1**, 417-425 (2015).

22. Kassambara, A. (2026).

23. Zheng, G.X. *et al.* Massively parallel digital transcriptional profiling of single cells. *Nat Commun* **8**, 14049 (2017).

24. Hao, Y. *et al.* Dictionary learning for integrative, multimodal and scalable single-cell analysis. *Nat Biotechnol* **42**, 293-304 (2024).

25. McGinnis, C.S., Murrow, L.M. & Gartner, Z.J. DoubletFinder: Doublet Detection in Single-Cell RNA Sequencing Data Using Artificial Nearest Neighbors. *Cell Syst* **8**, 329-337 e324 (2019).

26. Korsunsky, I. *et al.* Fast, sensitive and accurate integration of single-cell data with Harmony. *Nat Methods* **16**, 1289-1296 (2019).

27. Trapnell, C. *et al.* The dynamics and regulators of cell fate decisions are revealed by pseudotemporal ordering of single cells. *Nat Biotechnol* **32**, 381-386 (2014).

28. Kumar, N., Mishra, B., Athar, M. & Mukhtar, S. Inference of Gene Regulatory Network from Single-Cell Transcriptomic Data Using pySCENIC. *Methods Mol Biol* **2328**, 171-182 (2021).

29. Aibar, S. *et al.* SCENIC: single-cell regulatory network inference and clustering. *Nat Methods* **14**, 1083-1086 (2017).

30. Ashburner, M. *et al.* Gene ontology: tool for the unification of biology. The Gene Ontology Consortium. *Nat Genet* **25**, 25-29 (2000).

31. Gene Ontology, C. *et al.* The Gene Ontology knowledgebase in 2023. *Genetics* **224** (2023).

32. Deng, Q., Ramskold, D., Reinius, B. & Sandberg, R. Single-cell RNA-seq reveals dynamic, random monoallelic gene expression in mammalian cells. *Science* **343**, 193-196 (2014).

33. Posfai, E. *et al.* Position- and Hippo signaling-dependent plasticity during lineage segregation in the early mouse embryo. *Elife* **6** (2017).

34. Mohammed, H. *et al.* Single-Cell Landscape of Transcriptional Heterogeneity and Cell Fate Decisions during Mouse Early Gastrulation. *Cell Rep* **20**, 1215-1228 (2017).

35. Nowotschin, S. *et al.* The emergent landscape of the mouse gut endoderm at single-cell resolution. *Nature* **569**, 361-367 (2019).

36. Dann, E., Henderson, N.C., Teichmann, S.A., Morgan, M.D. & Marioni, J.C. Differential abundance testing on single-cell data using k-nearest neighbor graphs. *Nat Biotechnol* **40**, 245-253 (2022).

37. Zhao, C. *et al.* Author Correction: A comprehensive human embryo reference tool using single-cell RNA-sequencing data. *Nat Methods* **22**, 636 (2025).

38. Yates, A.D. *et al.* Ensembl 2020. *Nucleic Acids Res* **48**, D682-D688 (2020).

39. Haghverdi, L., Lun, A.T.L., Morgan, M.D. & Marioni, J.C. Batch effects in single-cell RNA-sequencing data are corrected by matching mutual nearest neighbors. *Nat Biotechnol* **36**, 421-427 (2018).

40. Hao, Y. *et al.* Integrated analysis of multimodal single-cell data. *Cell* **184**, 3573-3587 e3529 (2021).

41. Cao, J. *et al.* The single-cell transcriptional landscape of mammalian organogenesis. *Nature* **566**, 496-502 (2019).

42. Posfai, E. *et al.* Evaluating totipotency using criteria of increasing stringency. *Nat Cell Biol* **23**, 49-60 (2021).

43. Angelova, D.M. *et al.* Single-cell RNA sequencing identifies CXADR as a fate determinant of the placental exchange surface. *Nat Commun* **16**, 142 (2025).

44. Wu, T. *et al.* clusterProfiler 4.0: A universal enrichment tool for interpreting omics data. *Innovation (Camb)* **2**, 100141 (2021).

45. Langmead, B. & Salzberg, S.L. Fast gapped-read alignment with Bowtie 2. *Nat Methods* **9**, 357-359 (2012).

46. Nordin, A., Zambanini, G., Pagella, P. & Cantu, C. The CUT&RUN suspect list of problematic regions of the genome. *Genome Biol* **24**, 185 (2023).

47. Quinlan, A.R. & Hall, I.M. BEDTools: a flexible suite of utilities for comparing genomic features. *Bioinformatics* **26**, 841-842 (2010).

48. Ramirez, F., Dundar, F., Diehl, S., Gruning, B.A. & Manke, T. deepTools: a flexible platform for exploring deep-sequencing data. *Nucleic Acids Res* **42**, W187-191 (2014).

49. Yu, G., Wang, L.G. & He, Q.Y. ChIPseeker: an R/Bioconductor package for ChIP peak annotation, comparison and visualization. *Bioinformatics* **31**, 2382-2383 (2015).

50. Ross-Innes, C.S. *et al.* Differential oestrogen receptor binding is associated with clinical outcome in breast cancer. *Nature* **481**, 389-393 (2012).

51. Chen, H. & Boutros, P.C. VennDiagram: a package for the generation of highly-customizable Venn and Euler diagrams in R. *BMC Bioinformatics* **12**, 35 (2011).

52. Lawrence, M., Gentleman, R. & Carey, V. rtracklayer: an R package for interfacing with genome browsers. *Bioinformatics* **25**, 1841-1842 (2009).

53. Sun, J. *et al.* PKC inhibitors regulate stem cell self-renewal by regulating H3K27me3 and H3K9me3. *Am J Transl Res* **14**, 4295-4309 (2022).

54. Liu, W. *et al.* Identification of key factors conquering developmental arrest of somatic cell cloned embryos by combining embryo biopsy and single-cell sequencing. *Cell Discov* **2**, 16010 (2016).

55. Chen, G. *et al.* Single-cell analyses of X Chromosome inactivation dynamics and pluripotency during differentiation. *Genome Res* **26**, 1342-1354 (2016).

56. J, F.A. (Gene Expression Omnibus; 2019).

57. Amemiya, H.M., Kundaje, A. & Boyle, A.P. The ENCODE Blacklist: Identification of Problematic Regions of the Genome. *Sci Rep* **9**, 9354 (2019).
